# Supplementary material for: Genotypic performance of Australian durum under single and combined water-deficit and heat stress during reproduction
Source: PubMed Central journal article supplement (PMC6802220; doi:10.1038/s41598-019-49871-x), 2019-10-18

## Genotypic performance of Australian durum under single and combined water-deficit and heat stress during reproduction

Haipei Liu<sup>1\*</sup>, Amanda J. Able<sup>1</sup>, Jason A. Able<sup>1</sup>

<sup>1</sup> School of Agriculture, Food & Wine, Waite Research Institute, The University of Adelaide, Urrbrae, SA, Australia

### Supplementary Materials

**Supplementary Table S1.** Durum wheat varieties and University of Adelaide breeding lines used in this study and their abbreviation.

| Genotype      | Abbreviation | Information                                                                     |
|---------------|--------------|---------------------------------------------------------------------------------|
| DBA Aurora    | N/A          | Commercial variety, release from South Australia                                |
| DBA Spes      | N/A          | Commercial variety, release from South Australia                                |
| EGA Bellaroi  | N/A          | Commercial variety, release from New South Wales                                |
| WID802        | N/A          | Commercial variety, release from South Australia                                |
| UAD1151101    | L1           | Advanced DBA (Durum Breeding Australia) breeding line at University of Adelaide |
| UAD1154197    | L2           | Advanced DBA breeding line at University of Adelaide                            |
| UAD1301011-4  | L3           | Advanced DBA breeding line at University of Adelaide                            |
| UAD1301012-12 | L4           | Advanced DBA breeding line at University of Adelaide                            |
| UAD1301018-6  | L5           | Advanced DBA breeding line at University of Adelaide                            |
| UAD1301020-8  | L6           | Advanced DBA breeding line at University of Adelaide                            |

**Supplementary Table S2.** Rank summation index of ten durum genotypes based on their sensitivity to single water-deficit stress and single heat stress.

| <b>Water-deficit stress</b> |         |              |               |                        |                   |                        |
|-----------------------------|---------|--------------|---------------|------------------------|-------------------|------------------------|
| Genotype                    | Biomass | Grain weight | Harvest index | Grain number per plant | 1000-grain weight | <b>Summation Index</b> |
| DBA Aurora                  | 10      | 10           | 6             | 8                      | 10                | <b>44</b>              |
| L2                          | 8       | 9            | 10            | 9                      | 7                 | <b>43</b>              |
| L1                          | 7       | 8            | 9             | 10                     | 5                 | <b>39</b>              |
| WID802                      | 9       | 7            | 4             | 6                      | 8                 | <b>34</b>              |
| DBA Spes                    | 4       | 6            | 7             | 7                      | 2                 | <b>26</b>              |
| L5                          | 2       | 5            | 8             | 3                      | 6                 | <b>24</b>              |
| L3                          | 3       | 2            | 3             | 1                      | 9                 | <b>18</b>              |
| L4                          | 6       | 4            | 1             | 4                      | 3                 | <b>18</b>              |
| L6                          | 1       | 3            | 5             | 5                      | 1                 | <b>15</b>              |
| EGA Bellaroi                | 5       | 1            | 2             | 2                      | 4                 | <b>14</b>              |
| <b>Heat stress</b>          |         |              |               |                        |                   |                        |
| Genotype                    | Biomass | Grain weight | Harvest index | Grain number per plant | 1000-grain weight | <b>Summation Index</b> |
| L2                          | 10      | 10           | 10            | 10                     | 8                 | <b>48</b>              |
| DBA Aurora                  | 7       | 9            | 7             | 4                      | 10                | <b>37</b>              |
| WID802                      | 5       | 8            | 8             | 8                      | 3                 | <b>32</b>              |
| L1                          | 8       | 6            | 4             | 3                      | 9                 | <b>30</b>              |
| L4                          | 9       | 3            | 3             | 5                      | 7                 | <b>27</b>              |
| L6                          | 3       | 5            | 9             | 9                      | 1                 | <b>27</b>              |
| EGA Bellaroi                | 6       | 4            | 5             | 6                      | 5                 | <b>26</b>              |
| L5                          | 4       | 7            | 6             | 7                      | 2                 | <b>26</b>              |
| L3                          | 1       | 2            | 2             | 1                      | 6                 | <b>12</b>              |
| DBA Spes                    | 2       | 1            | 1             | 2                      | 4                 | <b>10</b>              |

**Supplementary Table S3.** Yield traits and reduction rate of ten durum wheat genotypes under water stress (WS); heat stress (HS) and combined water and heat stress (WSHS). Green highlights the lowest reduction rate across ten genotypes, while red highlights the highest reduction rate across ten genotypes. *P* value and l.s.d. is shown across genotypes for each trait under a given treatment. \* indicates statistical significance for the changes of yield traits under stress when compared with the control ( $P < 0.05$ ).

| <b>Biomass</b>      | DBA<br>Aurora | DBA<br>Spes | EGA<br>Bellaroi | WID802   | L1       | L2       | L3       | L4       | L5       | L6       | P value | l.s.d. |
|---------------------|---------------|-------------|-----------------|----------|----------|----------|----------|----------|----------|----------|---------|--------|
| CG                  | 19.217        | 16.410      | 14.792          | 13.022   | 14.280   | 17.868   | 16.818   | 15.203   | 16.725   | 17.762   | <0.001  | 1.874  |
| WS                  | 17.683        | 12.533      | 11.572          | 11.370   | 12.122   | 15.270   | 12.382   | 12.665   | 12.173   | 12.917   | <0.001  | 1.605  |
| HS                  | 15.517        | 11.185      | 11.778          | 10.347   | 11.553   | 14.938   | 11.137   | 12.330   | 13.017   | 12.283   | <0.001  | 1.703  |
| WSHS                | 15.158        | 8.355       | 9.393           | 10.057   | 9.595    | 13.215   | 10.235   | 10.287   | 11.122   | 8.433    | <0.001  | 1.301  |
| WS reduction rate   | -7.98%        | -23.62%*    | -21.77%*        | -12.68%  | -15.11%* | -14.54%* | -26.38%* | -16.70%* | -27.21%* | -27.28%* | N/A     | N/A    |
| HS reduction rate   | -19.25%*      | -31.84%*    | -20.37%*        | -20.54%* | -19.09%* | -16.40%* | -33.78%* | -18.90%* | -22.17%* | -30.84%* | N/A     | N/A    |
| WSHS reduction rate | -21.12%*      | -49.09%*    | -36.50%*        | -22.77%* | -32.81%* | -26.04%* | -39.14%* | -32.34%* | -33.50%* | -52.52%* | N/A     | N/A    |

| <b>Grain weight</b> | DBA<br>Aurora | DBA<br>Spes | EGA<br>Bellaroi | WID802   | L1       | L2       | L3       | L4       | L5       | L6       | P value | l.s.d. |
|---------------------|---------------|-------------|-----------------|----------|----------|----------|----------|----------|----------|----------|---------|--------|
| CG                  | 9.853         | 8.873       | 7.505           | 6.482    | 7.235    | 9.145    | 8.863    | 7.663    | 9.010    | 8.158    | <0.001  | 1.171  |
| WS                  | 8.568         | 6.462       | 4.940           | 5.080    | 5.985    | 7.828    | 5.835    | 5.337    | 6.377    | 5.647    | <0.001  | 0.873  |
| HS                  | 6.983         | 4.613       | 5.072           | 4.587    | 4.943    | 7.785    | 4.677    | 5.168    | 6.177    | 5.523    | <0.001  | 0.932  |
| WSHS                | 6.517         | 3.855       | 3.252           | 3.997    | 4.343    | 5.670    | 3.807    | 4.110    | 5.010    | 3.230    | <0.001  | 0.701  |
| WS reduction rate   | -13.04%*      | -27.18%*    | -34.18%*        | -21.63%* | -17.28%* | -14.40%* | -34.17%* | -30.36%* | -29.23%* | -30.79%* | N/A     | N/A    |
| HS reduction rate   | -29.13%*      | -48.01%*    | -32.42%*        | -29.24%* | -31.67%* | -14.87%* | -47.24%* | -32.56%* | -31.45%* | -32.30%* | N/A     | N/A    |
| WSHS reduction rate | -33.86%*      | -56.56%*    | -56.67%*        | -38.34%* | -39.97%* | -38.00%* | -57.05%* | -46.37%* | -44.40%* | -60.41%* | N/A     | N/A    |

Supplementary Table S3 continued.

| Harvest index       | DBA Aurora | DBA Spes | EGA Bellaroi | WID802   | L1       | L2       | L3       | L4       | L5       | L6       | P value | l.s.d. |
|---------------------|------------|----------|--------------|----------|----------|----------|----------|----------|----------|----------|---------|--------|
| CG                  | 0.512      | 0.540    | 0.506        | 0.497    | 0.505    | 0.513    | 0.526    | 0.504    | 0.538    | 0.460    | <0.001  | 0.0283 |
| WS                  | 0.485      | 0.515    | 0.429        | 0.446    | 0.494    | 0.513    | 0.471    | 0.422    | 0.525    | 0.434    | <0.001  | 0.0316 |
| HS                  | 0.451      | 0.412    | 0.430        | 0.443    | 0.428    | 0.521    | 0.418    | 0.419    | 0.473    | 0.447    | <0.001  | 0.0321 |
| WSHS                | 0.430      | 0.460    | 0.345        | 0.395    | 0.453    | 0.429    | 0.371    | 0.398    | 0.449    | 0.383    | <0.001  | 0.0299 |
| WS reduction rate   | -5.34%     | -4.58%   | -15.24%*     | -10.28%* | -2.17%   | -0.01%   | -10.58%* | -16.41%* | -2.34%   | -5.51%   | N/A     | N/A    |
| HS reduction rate   | -11.81%*   | -23.71%* | -15.05%*     | -10.81%* | -15.19%* | 1.66%    | -20.57%* | -16.86%* | -12.12%* | -2.71%   | N/A     | N/A    |
| WSHS reduction rate | -15.96%*   | -14.87%* | -31.72%*     | -20.52%* | -10.29%* | -16.35%* | -29.42%* | -20.99%* | -16.47%* | -16.75%* | N/A     | N/A    |

| Grain number per plant | DBA Aurora | DBA Spes | EGA Bellaroi | WID802   | L1       | L2       | L3       | L4       | L5       | L6       | P value | l.s.d. |
|------------------------|------------|----------|--------------|----------|----------|----------|----------|----------|----------|----------|---------|--------|
| CG                     | 234.00     | 169.00   | 174.83       | 160.83   | 170.17   | 208.17   | 199.33   | 169.33   | 184.17   | 161.00   | <0.001  | 25.12  |
| WS                     | 183.50     | 127.17   | 115.33       | 118.17   | 139.67   | 167.33   | 121.67   | 118.67   | 128.83   | 116.50   | <0.001  | 19.46  |
| HS                     | 155.00     | 97.83    | 124.33       | 128.67   | 110.00   | 175.50   | 108.67   | 114.67   | 142.83   | 128.83   | <0.001  | 21.22  |
| WS reduction rate      | 144.50     | 90.83    | 78.67        | 119.17   | 101.33   | 127.67   | 96.00    | 99.33    | 103.67   | 74.17    | <0.001  | 17.48  |
| HS reduction rate      | -21.58%*   | -24.75%* | -34.03%*     | -26.53%* | -17.92%* | -19.62%* | -38.96%* | -29.92%* | -30.05%* | -27.64%* | N/A     | N/A    |
| WSHS reduction rate    | -33.76%*   | -42.11%* | -28.88%*     | -20.00%* | -35.36%* | -15.69%* | -45.48%* | -32.28%* | -22.44%* | -19.98%* | N/A     | N/A    |
| WS reduction rate      | -38.25%*   | -46.25%* | -55.00%*     | -25.91%* | -40.45%* | -38.67%* | -51.84%* | -41.34%* | -43.71%* | -53.93%* | N/A     | N/A    |

Supplementary Table S3 continued.

| <b>1000-grain weight</b> | DBA<br>Aurora | DBA<br>Spes | EGA<br>Bellaroi | WID802   | L1    | L2    | L3       | L4      | L5       | L6       | P value | l.s.d. |
|--------------------------|---------------|-------------|-----------------|----------|-------|-------|----------|---------|----------|----------|---------|--------|
| CG                       | 42.06         | 52.68       | 42.84           | 40.37    | 42.45 | 43.98 | 44.40    | 45.39   | 48.84    | 50.86    | <0.001  | 2.257  |
| WS                       | 46.69         | 50.72       | 42.92           | 43.02    | 42.90 | 46.85 | 48.17    | 44.92   | 49.74    | 48.52    | <0.001  | 2.049  |
| HS                       | 45.32         | 47.27       | 40.69           | 35.74    | 45.09 | 44.33 | 42.91    | 45.08   | 43.09    | 42.86    | <0.001  | 2.338  |
| WS reduction rate        | 45.26         | 42.42       | 41.30           | 33.46    | 42.80 | 44.63 | 39.64    | 41.36   | 48.62    | 43.60    | <0.001  | 2.595  |
| HS reduction rate        | 11.02%*       | -3.71%      | 0.18%           | 6.56%*   | 1.07% | 6.55% | 8.47%*   | -1.04%  | 1.83%    | -4.59%   | N/A     | N/A    |
| WSHS reduction rate      | 7.74%*        | -10.27%*    | -5.03%*         | -11.45%* | 6.24% | 0.81% | -3.36%   | -0.69%  | -11.78%* | -15.72%* | N/A     | N/A    |
| WS reduction rate        | 7.60%*        | -19.47%*    | -3.61%          | -17.10%* | 0.84% | 1.50% | -10.73%* | -8.88%* | -0.44%   | -14.28%* | N/A     | N/A    |

| <b>Fertility</b>    | DBA<br>Aurora | DBA<br>Spes | EGA<br>Bellaroi | WID802   | L1       | L2       | L3       | L4       | L5       | L6       | P value | l.s.d. |
|---------------------|---------------|-------------|-----------------|----------|----------|----------|----------|----------|----------|----------|---------|--------|
| CG                  | 2.83          | 2.37        | 2.46            | 2.58     | 2.96     | 2.83     | 2.79     | 2.48     | 2.86     | 2.57     | <0.001  | 0.242  |
| WS                  | 2.61          | 2.16        | 1.97            | 2.26     | 2.30     | 2.83     | 1.96     | 2.07     | 2.44     | 2.18     | <0.001  | 0.263  |
| HS                  | 2.21          | 1.58        | 2.24            | 2.23     | 2.16     | 2.82     | 2.10     | 2.14     | 2.64     | 2.21     | <0.001  | 0.202  |
| WS reduction rate   | 2.52          | 2.11        | 1.67            | 2.03     | 2.01     | 2.28     | 1.64     | 1.93     | 2.07     | 1.64     | <0.001  | 0.234  |
| HS reduction rate   | -7.80%        | -8.89%*     | -19.94%*        | -12.35%* | -22.29%* | -0.09%   | -29.75%* | -16.52%* | -14.71%* | -15.11%* | N/A     | N/A    |
| WSHS reduction rate | -21.78%*      | -33.31%*    | -8.93%          | -13.39%* | -26.97%* | -0.43%   | -24.51%* | -13.91%* | -7.72%   | -13.95%* | N/A     | N/A    |
| WS reduction rate   | -11.01%       | -10.95%*    | -32.04%*        | -21.35%* | -32.30%* | -19.56%* | -41.28%* | -22.34%* | -27.76%* | -36.21%* | N/A     | N/A    |

Supplementary Table S3 continued.

| Fertile spike number | DBA Aurora | DBA Spes | EGA Bellaroi | WID802   | L1       | L2       | L3       | L4       | L5       | L6       | P value | l.s.d. |
|----------------------|------------|----------|--------------|----------|----------|----------|----------|----------|----------|----------|---------|--------|
| CG                   | 5.33       | 5.00     | 5.33         | 6.50     | 5.50     | 5.33     | 5.00     | 5.33     | 4.50     | 4.67     | <0.001  | 0.680  |
| WS                   | 4.83       | 4.50     | 4.33         | 5.67     | 4.33     | 4.50     | 3.83     | 4.00     | 4.00     | 3.17     | <0.001  | 0.646  |
| HS                   | 4.17       | 4.17     | 4.83         | 5.50     | 4.17     | 4.33     | 3.67     | 4.17     | 3.50     | 3.00     | <0.001  | 0.514  |
| WSHS                 | 3.67       | 3.50     | 3.83         | 4.33     | 4.00     | 3.67     | 3.67     | 4.17     | 3.17     | 3.00     | <0.001  | 0.552  |
| WS                   | -9.38%     | -10.00%  | -18.75%*     | -12.82%* | -21.21%* | -15.63%* | -23.33%* | -25.00%* | -11.11%  | -32.14%* | N/A     | N/A    |
| HS                   | -21.88%*   | -16.67%* | -9.38%       | -15.38%* | -24.24%* | -18.75%* | -26.67%* | -21.88%* | -22.22%* | -35.71%* | N/A     | N/A    |
| WSHS                 | -31.25%*   | -30.00%* | -28.13%*     | -33.33%* | -27.27%* | -31.25%* | -26.67%* | -21.88%* | -29.63%* | -35.71%* | N/A     | N/A    |

**Supplementary Table S4.** qPCR primers used in this study.

| <b>Gene name</b> | <b>Description</b>       | <b>Forward primer (5' to 3')</b> | <b>Reverse primer (5' to 3')</b>                                         |
|------------------|--------------------------|----------------------------------|--------------------------------------------------------------------------|
| miR160           |                          | CTGGCTCCCTGTATGCCAAA             | Universal primer provided in the MystiCq microRNA cDNA Synthesis Mix Kit |
| miR396           |                          | CCTTCCACAGCTTTCTTGA ACTT         | Universal primer provided in the MystiCq microRNA cDNA Synthesis Mix Kit |
| CL33956Contig1   | Auxin response factor 8  | CATTATCATCACACCGACAGCTAC         | GGGTAAGGTGGAGATCCGATAAA                                                  |
| CL3649Contig1    | Auxin response factor 18 | CCTATGCTGTTACTCGGACAA            | TGAGCACAAAGCCCTTAGGTA                                                    |
| CL1Contig1941    | Heat shock protein 90    | CCAGCCTCAAGGACTATGTGA            | GCTTCTCAAGGAAGGGAGAG                                                     |
| contig102950     | Heat shock protein 90    | ACTCCACCAACAGGACCAAG             | CAGCACCTCATAGCCCTTCT                                                     |
| KukriC15_415     | Heat shock protein 90    | AGGAGGGGACAGAACGAGAT             | TGACCAATGGCATACTCATCA                                                    |
| GAPDH            | GAPDH as reference gene  | CTTCCAGGGTGACAACAGGT             | GTGCTGTATCCCCACTCGTT                                                     |





|        |       |       |       |       |       |  |  |
|--------|-------|-------|-------|-------|-------|--|--|
| l.s.d. | 0.928 | 0.963 | 0.916 | 1.023 | 1.278 |  |  |
|--------|-------|-------|-------|-------|-------|--|--|

| <b>L2 (CC)</b>    | 5DPA   | 15DPA  | 25DPA  | 35DPA  | 45DPA  | F pr. (DPA) | l.s.d. |
|-------------------|--------|--------|--------|--------|--------|-------------|--------|
| CG                | 61.80  | 61.02  | 59.25  | 55.75  | 52.25  | <0.001      | 0.879  |
| WS                | 60.57  | 59.43  | 57.28  | 53.87  | 49.77  | <0.001      | 0.888  |
| HS                | 60.57  | 59.38  | 57.63  | 52.33  | 48.48  | <0.001      | 0.900  |
| WSHS              | 59.67  | 59.02  | 56.80  | 51.27  | 47.38  | <0.001      | 0.842  |
| F pr. (Treatment) | <0.001 | <0.001 | <0.001 | <0.001 | <0.001 |             |        |
| l.s.d.            | 0.878  | 0.727  | 0.81   | 0.953  | 1.042  |             |        |

| <b>L3 (CC)</b>    | 5DPA   | 15DPA  | 25DPA  | 35DPA  | 45DPA  | F pr. (DPA) | l.s.d. |
|-------------------|--------|--------|--------|--------|--------|-------------|--------|
| CG                | 60.35  | 58.87  | 56.92  | 54.13  | 49.30  | <0.001      | 0.895  |
| WS                | 57.65  | 55.30  | 53.15  | 51.72  | 43.57  | <0.001      | 0.904  |
| HS                | 58.58  | 56.28  | 53.17  | 50.43  | 43.80  | <0.001      | 0.807  |
| WSHS              | 57.17  | 54.35  | 52.12  | 47.20  | 39.60  | <0.001      | 0.949  |
| F pr. (Treatment) | <0.001 | <0.001 | <0.001 | <0.001 | <0.001 |             |        |
| l.s.d.            | 0.819  | 0.903  | 0.891  | 0.83   | 1.047  |             |        |

| <b>L4 (CC)</b>    | 5DPA   | 15DPA  | 25DPA  | 35DPA  | 45DPA  | F pr. (DPA) | l.s.d. |
|-------------------|--------|--------|--------|--------|--------|-------------|--------|
| CG                | 60.82  | 58.20  | 56.08  | 53.63  | 51.23  | <0.001      | 0.886  |
| WS                | 58.67  | 55.88  | 54.07  | 50.98  | 47.48  | <0.001      | 0.835  |
| HS                | 58.32  | 55.37  | 53.37  | 50.10  | 47.03  | <0.001      | 0.922  |
| WSHS              | 57.80  | 54.63  | 52.47  | 49.42  | 45.45  | <0.001      | 1.013  |
| F pr. (Treatment) | <0.001 | <0.001 | <0.001 | <0.001 | <0.001 |             |        |
| l.s.d.            | 0.849  | 0.931  | 0.847  | 0.982  | 1.019  |             |        |

| <b>L5 (CC)</b>    | 5DPA   | 15DPA  | 25DPA  | 35DPA  | 45DPA  | F pr. (DPA) | l.s.d. |
|-------------------|--------|--------|--------|--------|--------|-------------|--------|
| CG                | 61.35  | 61.20  | 60.18  | 57.60  | 55.72  | <0.001      | 0.860  |
| WS                | 58.80  | 57.02  | 55.45  | 52.03  | 49.35  | <0.001      | 0.866  |
| HS                | 58.75  | 57.75  | 55.98  | 52.43  | 48.30  | <0.001      | 0.870  |
| WSHS              | 57.97  | 55.95  | 52.87  | 50.82  | 48.12  | <0.001      | 0.934  |
| F pr. (Treatment) | <0.001 | <0.001 | <0.001 | <0.001 | <0.001 |             |        |
| l.s.d.            | 0.862  | 0.825  | 0.783  | 0.966  | 1.014  |             |        |

| <b>L6 (CC)</b>    | 5DPA   | 15DPA  | 25DPA  | 35DPA  | 45DPA  | F pr. (DPA) | l.s.d. |
|-------------------|--------|--------|--------|--------|--------|-------------|--------|
| CG                | 62.15  | 60.82  | 59.17  | 55.45  | 50.48  | <0.001      | 0.973  |
| WS                | 57.95  | 56.65  | 54.80  | 50.68  | 42.67  | <0.001      | 0.895  |
| HS                | 60.42  | 56.85  | 55.02  | 50.43  | 41.85  | <0.001      | 0.890  |
| WSHS              | 57.88  | 55.62  | 52.42  | 47.97  | 39.12  | <0.001      | 0.893  |
| F pr. (Treatment) | <0.001 | <0.001 | <0.001 | <0.001 | <0.001 |             |        |
| l.s.d.            | 0.927  | 0.859  | 0.86   | 0.861  | 1.097  |             |        |

| <b>DBA Aurora (SC)</b> | 5DPA   | 15DPA  | 25DPA  | 35DPA  | 45DPA  | F pr. (DPA) | l.s.d. |
|------------------------|--------|--------|--------|--------|--------|-------------|--------|
| CG                     | 375.22 | 361.17 | 374.20 | 283.25 | 220.10 | <0.001      | 32.21  |



|        |       |      |       |     |      |  |  |
|--------|-------|------|-------|-----|------|--|--|
| l.s.d. | 10.99 | 9.15 | 11.15 | 8.9 | 8.02 |  |  |
|--------|-------|------|-------|-----|------|--|--|

| <b>L3 (SC)</b>    | 5DPA   | 15DPA  | 25DPA  | 35DPA  | 45DPA  | F pr. (DPA) | l.s.d. |
|-------------------|--------|--------|--------|--------|--------|-------------|--------|
| CG                | 390.88 | 368.27 | 379.00 | 284.75 | 227.33 | <0.001      | 32.16  |
| WS                | 84.50  | 77.20  | 72.27  | 59.90  | 49.08  | <0.001      | 9.79   |
| HS                | 78.67  | 72.52  | 67.32  | 52.90  | 46.70  | <0.001      | 8.89   |
| WSHS              | 73.98  | 65.70  | 60.28  | 49.10  | 45.87  | <0.001      | 8.01   |
| F pr. (Treatment) | <0.001 | <0.001 | <0.001 | <0.001 | <0.001 |             |        |
| l.s.d.            | 9.25   | 9.34   | 8.71   | 8.22   | 7.68   |             |        |

| <b>L4 (SC)</b>    | 5DPA   | 15DPA  | 25DPA  | 35DPA  | 45DPA  | F pr. (DPA) | l.s.d. |
|-------------------|--------|--------|--------|--------|--------|-------------|--------|
| CG                | 347.72 | 340.88 | 356.57 | 284.90 | 233.20 | <0.001      | 34.79  |
| WS                | 103.63 | 95.40  | 84.25  | 77.07  | 72.85  | <0.001      | 11.85  |
| HS                | 123.82 | 111.02 | 99.08  | 72.38  | 61.20  | <0.001      | 14.04  |
| WSHS              | 88.72  | 82.30  | 73.40  | 65.82  | 60.33  | <0.001      | 8.65   |
| F pr. (Treatment) | <0.001 | <0.001 | <0.001 | <0.001 | <0.001 |             |        |
| l.s.d.            | 9.96   | 10.11  | 11.24  | 8.05   | 9.25   |             |        |

| <b>L5 (SC)</b>    | 5DPA   | 15DPA  | 25DPA  | 35DPA  | 45DPA  | F pr. (DPA) | l.s.d. |
|-------------------|--------|--------|--------|--------|--------|-------------|--------|
| CG                | 389.80 | 367.00 | 382.82 | 335.48 | 255.48 | <0.001      | 37.78  |
| WS                | 136.80 | 123.45 | 108.75 | 91.15  | 72.38  | <0.001      | 17.00  |
| HS                | 128.82 | 116.02 | 95.87  | 76.40  | 56.97  | <0.001      | 14.68  |
| WSHS              | 100.77 | 92.87  | 82.92  | 74.40  | 53.90  | <0.001      | 10.72  |
| F pr. (Treatment) | <0.001 | <0.001 | <0.001 | <0.001 | <0.001 |             |        |
| l.s.d.            | 11.76  | 11.53  | 11.13  | 10.67  | 9.71   |             |        |

| <b>L6 (SC)</b>    | 5DPA   | 15DPA  | 25DPA  | 35DPA  | 45DPA  | F pr. (DPA) | l.s.d. |
|-------------------|--------|--------|--------|--------|--------|-------------|--------|
| CG                | 356.88 | 367.83 | 354.20 | 263.25 | 235.10 | <0.001      | 35.70  |
| WS                | 86.52  | 81.28  | 73.08  | 57.57  | 51.20  | <0.001      | 12.18  |
| HS                | 114.43 | 88.23  | 76.92  | 54.17  | 44.92  | <0.001      | 12.78  |
| WSHS              | 72.28  | 64.48  | 60.43  | 51.75  | 41.60  | <0.001      | 9.80   |
| F pr. (Treatment) | <0.001 | <0.001 | <0.001 | <0.001 | <0.001 |             |        |
| l.s.d.            | 24.92  | 20.72  | 20.9   | 19.55  | 16.97  |             |        |

| <b>DBA Aurora (RWC)</b> | 5DPA   | 15DPA  | 25DPA  | 35DPA  | 45DPA  | F pr. (DPA) | l.s.d. |
|-------------------------|--------|--------|--------|--------|--------|-------------|--------|
| CG                      | 95.23% | 93.55% | 91.84% | 84.33% | 72.93% | <0.001      | 2.28%  |
| WS                      | 93.32% | 90.66% | 87.34% | 77.65% | 66.80% | <0.001      | 2.66%  |
| HS                      | 91.98% | 90.08% | 86.15% | 76.48% | 64.69% | <0.001      | 2.66%  |
| WSHS                    | 91.23% | 88.10% | 84.46% | 77.41% | 63.93% | <0.001      | 2.69%  |
| F pr. (Treatment)       | 0.057  | 0.014  | 0.002  | <0.001 | <0.001 |             |        |
| l.s.d.                  |        | 2.83%  | 2.97%  | 1.89%  | 2.58%  |             |        |

| <b>DBA Spes (RWC)</b> | 5DPA | 15DPA | 25DPA | 35DPA | 45DPA | F pr. (DPA) | l.s.d. |
|-----------------------|------|-------|-------|-------|-------|-------------|--------|
|-----------------------|------|-------|-------|-------|-------|-------------|--------|

|                   |        |        |        |        |        |        |       |
|-------------------|--------|--------|--------|--------|--------|--------|-------|
| CG                | 94.71% | 93.53% | 93.05% | 87.43% | 80.65% | <0.001 | 2.44% |
| WS                | 92.30% | 90.27% | 84.75% | 79.97% | 71.72% | <0.001 | 2.23% |
| HS                | 92.52% | 89.24% | 85.58% | 79.21% | 71.01% | <0.001 | 2.17% |
| WSHS              | 90.75% | 86.01% | 81.44% | 78.04% | 68.07% | <0.001 | 2.50% |
| F pr. (Treatment) | 0.004  | <0.001 | <0.001 | <0.001 | <0.001 |        |       |
| l.s.d.            | 1.64%  | 1.80%  | 2.25%  | 2.77%  | 3.27%  |        |       |

|                           |        |        |        |        |        |             |        |
|---------------------------|--------|--------|--------|--------|--------|-------------|--------|
| <b>EGA Bellaroi (RWC)</b> | 5DPA   | 15DPA  | 25DPA  | 35DPA  | 45DPA  | F pr. (DPA) | l.s.d. |
| CG                        | 95.10% | 93.76% | 93.21% | 82.32% | 74.79% | <0.001      | 2.87%  |
| WS                        | 87.40% | 85.16% | 80.81% | 71.79% | 64.27% | <0.001      | 3.16%  |
| HS                        | 91.41% | 88.23% | 83.10% | 72.51% | 64.92% | <0.001      | 2.76%  |
| WSHS                      | 85.43% | 84.11% | 79.72% | 71.22% | 63.97% | <0.001      | 2.66%  |
| F pr. (Treatment)         | <0.001 | <0.001 | <0.001 | <0.001 | <0.001 |             |        |
| l.s.d.                    | 2.07%  | 2.80%  | 3.89%  | 2.57%  | 3.19%  |             |        |

|                     |        |        |        |        |        |             |        |
|---------------------|--------|--------|--------|--------|--------|-------------|--------|
| <b>WID802 (RWC)</b> | 5DPA   | 15DPA  | 25DPA  | 35DPA  | 45DPA  | F pr. (DPA) | l.s.d. |
| CG                  | 94.65% | 92.82% | 89.74% | 86.76% | 75.88% | <0.001      | 2.78%  |
| WS                  | 89.30% | 87.10% | 84.38% | 80.40% | 68.30% | <0.001      | 2.68%  |
| HS                  | 91.37% | 89.86% | 85.07% | 80.22% | 67.64% | <0.001      | 2.52%  |
| WSHS                | 87.54% | 84.27% | 80.96% | 76.72% | 65.69% | <0.001      | 2.97%  |
| F pr. (Treatment)   | <0.001 | <0.001 | <0.001 | <0.001 | 0.001  |             |        |
| l.s.d.              | 2.14%  | 2.57%  | 2.95%  | 2.45%  | 3.80%  |             |        |

|                   |        |        |        |        |        |             |        |
|-------------------|--------|--------|--------|--------|--------|-------------|--------|
| <b>L1 (RWC)</b>   | 5DPA   | 15DPA  | 25DPA  | 35DPA  | 45DPA  | F pr. (DPA) | l.s.d. |
| CG                | 94.22% | 92.82% | 90.64% | 85.53% | 67.36% | <0.001      | 2.32%  |
| WS                | 87.77% | 81.74% | 79.39% | 76.51% | 58.40% | <0.001      | 2.98%  |
| HS                | 88.02% | 85.31% | 82.95% | 77.74% | 60.30% | <0.001      | 1.99%  |
| WSHS              | 85.58% | 79.90% | 77.80% | 73.74% | 54.50% | <0.001      | 4.03%  |
| F pr. (Treatment) | <0.001 | <0.001 | <0.001 | <0.001 | 0.001  |             |        |
| l.s.d.            | 2.75%  | 2.92%  | 2.30%  | 2.37%  | 3.80%  |             |        |

|                   |        |        |        |        |        |             |        |
|-------------------|--------|--------|--------|--------|--------|-------------|--------|
| <b>L2 (RWC)</b>   | 5DPA   | 15DPA  | 25DPA  | 35DPA  | 45DPA  | F pr. (DPA) | l.s.d. |
| CG                | 95.04% | 94.36% | 90.41% | 85.81% | 76.78% | <0.001      | 1.84%  |
| WS                | 93.52% | 91.26% | 85.74% | 79.61% | 69.03% | <0.001      | 2.22%  |
| HS                | 92.57% | 89.13% | 84.12% | 78.54% | 68.02% | <0.001      | 2.28%  |
| WSHS              | 90.17% | 88.41% | 83.61% | 76.04% | 65.92% | <0.001      | 2.57%  |
| F pr. (Treatment) | 0.002  | <0.001 | <0.001 | <0.001 | <0.001 |             |        |
| l.s.d.            | 1.79%  | 1.98%  | 2.48%  | 2.68%  | 2.54%  |             |        |

|                 |        |        |        |        |        |             |        |
|-----------------|--------|--------|--------|--------|--------|-------------|--------|
| <b>L3 (RWC)</b> | 5DPA   | 15DPA  | 25DPA  | 35DPA  | 45DPA  | F pr. (DPA) | l.s.d. |
| CG              | 95.19% | 92.29% | 90.64% | 87.29% | 72.93% | <0.001      | 2.58%  |
| WS              | 89.30% | 84.96% | 82.02% | 73.74% | 61.77% | <0.001      | 2.60%  |
| HS              | 91.63% | 84.14% | 82.15% | 74.54% | 60.49% | <0.001      | 2.32%  |

|                   |        |        |        |        |        |        |       |
|-------------------|--------|--------|--------|--------|--------|--------|-------|
| WSHS              | 88.72% | 83.01% | 77.49% | 70.06% | 55.42% | <0.001 | 2.47% |
| F pr. (Treatment) | 0.001  | <0.001 | <0.001 | <0.001 | <0.001 |        |       |
| l.s.d.            | 2.46%  | 2.21%  | 2.39%  | 2.71%  | 3.05%  |        |       |

|                   |        |        |        |        |        |             |        |
|-------------------|--------|--------|--------|--------|--------|-------------|--------|
| <b>L4 (RWC)</b>   | 5DPA   | 15DPA  | 25DPA  | 35DPA  | 45DPA  | F pr. (DPA) | l.s.d. |
| CG                | 94.37% | 93.49% | 91.00% | 85.89% | 75.55% | <0.001      | 2.56%  |
| WS                | 88.67% | 86.23% | 82.69% | 73.15% | 62.50% | <0.001      | 2.25%  |
| HS                | 87.85% | 85.32% | 82.52% | 72.46% | 60.49% | <0.001      | 2.22%  |
| WSHS              | 85.16% | 83.44% | 79.57% | 72.28% | 56.77% | <0.001      | 2.12%  |
| F pr. (Treatment) | 0.001  | <0.001 | <0.001 | <0.001 | <0.001 |             |        |
| l.s.d.            | 1.83%  | 2.13%  | 1.99%  | 1.99%  | 3.52%  |             |        |

|                   |        |        |        |        |        |             |        |
|-------------------|--------|--------|--------|--------|--------|-------------|--------|
| <b>L5 (RWC)</b>   | 5DPA   | 15DPA  | 25DPA  | 35DPA  | 45DPA  | F pr. (DPA) | l.s.d. |
| CG                | 95.12% | 93.33% | 90.30% | 86.99% | 81.89% | <0.001      | 1.83%  |
| WS                | 90.95% | 85.16% | 81.81% | 76.43% | 71.11% | <0.001      | 2.31%  |
| HS                | 92.48% | 86.16% | 78.81% | 73.05% | 67.72% | <0.001      | 2.51%  |
| WSHS              | 90.67% | 85.28% | 78.33% | 72.17% | 63.88% | <0.001      | 2.38%  |
| F pr. (Treatment) | 0.003  | <0.001 | <0.001 | <0.001 | <0.001 |             |        |
| l.s.d.            | 2.02%  | 1.86%  | 2.29%  | 2.19%  | 3.17%  |             |        |

|                   |        |        |        |        |        |             |        |
|-------------------|--------|--------|--------|--------|--------|-------------|--------|
| <b>L6 (RWC)</b>   | 5DPA   | 15DPA  | 25DPA  | 35DPA  | 45DPA  | F pr. (DPA) | l.s.d. |
| CG                | 95.23% | 93.11% | 92.29% | 83.59% | 73.73% | <0.001      | 1.92%  |
| WS                | 89.85% | 84.81% | 80.41% | 71.07% | 59.96% | <0.001      | 2.74%  |
| HS                | 91.70% | 86.99% | 83.47% | 71.93% | 60.74% | <0.001      | 2.62%  |
| WSHS              | 85.84% | 82.35% | 79.10% | 70.03% | 57.46% | <0.001      | 2.23%  |
| F pr. (Treatment) | <0.001 | <0.001 | <0.001 | <0.001 | <0.001 |             |        |
| l.s.d.            | 2.74%  | 1.95%  | 2.17%  | 2.29%  | 3.10%  |             |        |

**Supplementary Figure S1.** A schematic representation of different stress treatments applied in this study. CG, control group; WS, water stress group; HS, heat stress group; WSHS, combined water stress and heat stress group. 22/12°C and 37/27°C represent day/night temperatures with a 12h photoperiod. Field capacity was 12% soil water content.

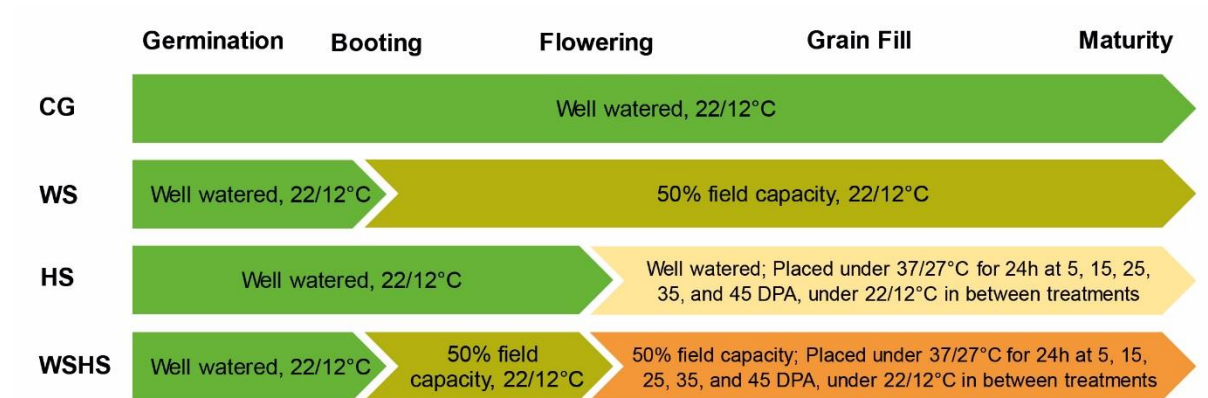

**Supplementary Figure S2.** Images of stress-sensitive genotype L6 at five time-points in four treatment groups. CG, control group; WS, water stress group; HS, heat stress group; WSHS, combined water stress and heat stress group. The pot size was 8.5 cm × 8.5 cm × 18 cm.

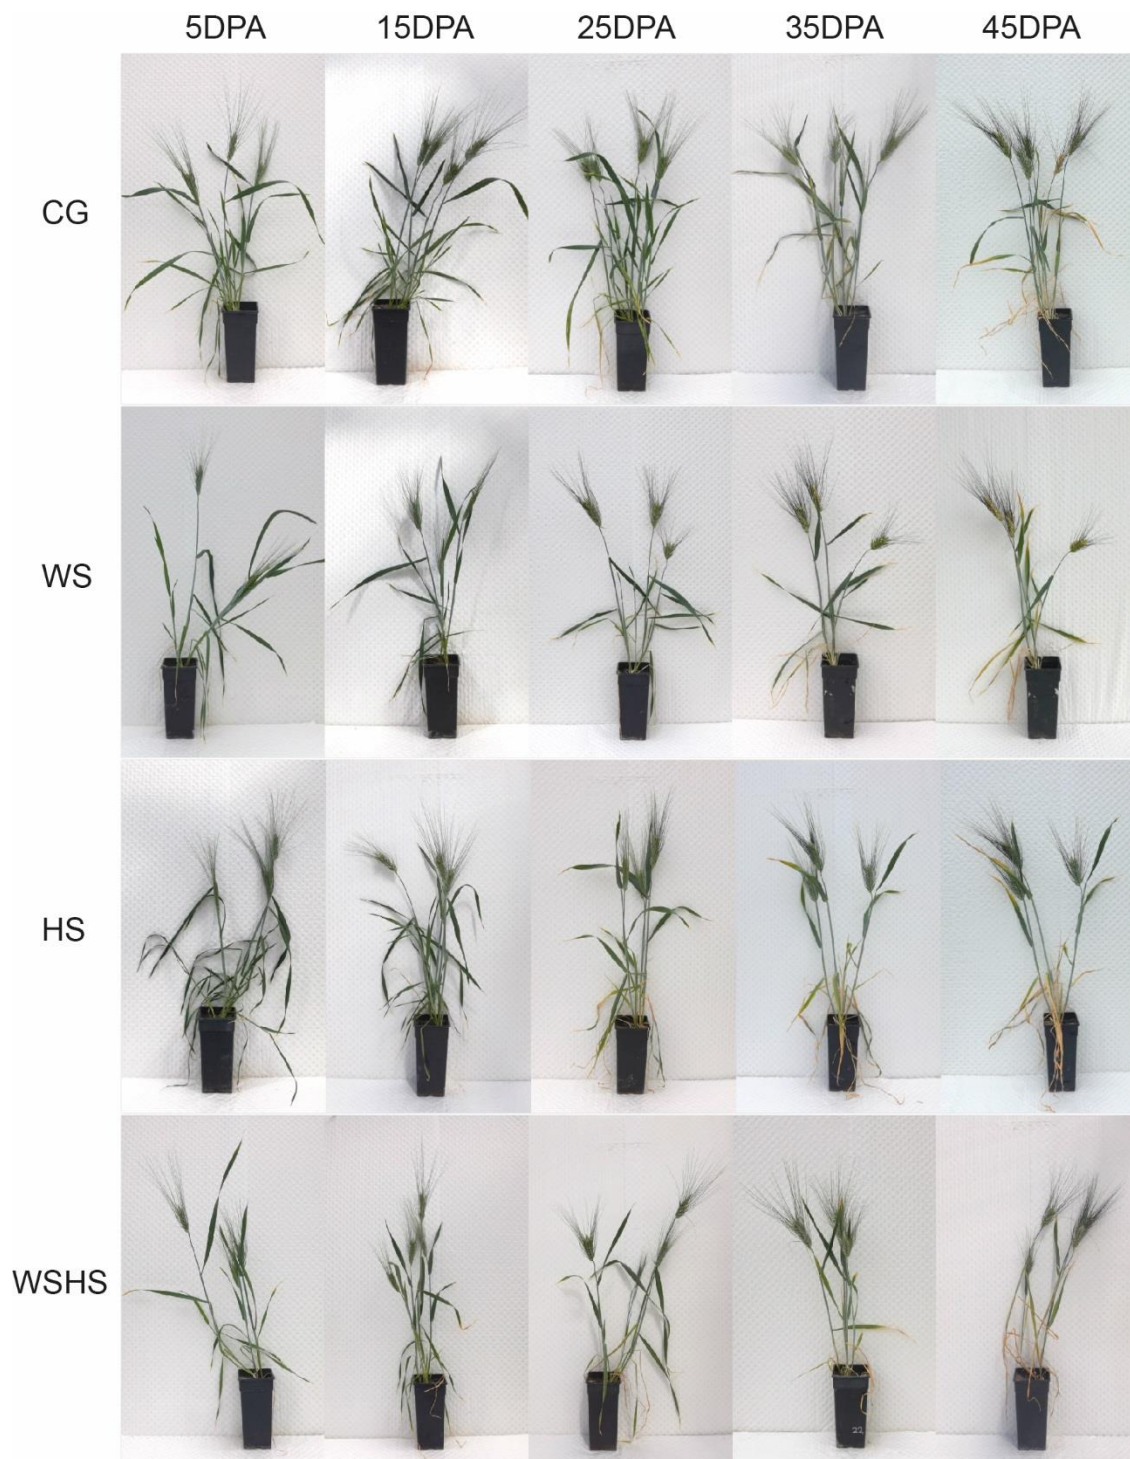



**Supplementary Figure S3.** Images of stress-tolerant DBA Aurora at five time-points in four treatment groups. CG, control group; WS, water stress group; HS, heat stress group; WSHS, combined water stress and heat stress group. The pot size was 8.5 cm × 8.5 cm × 18 cm.

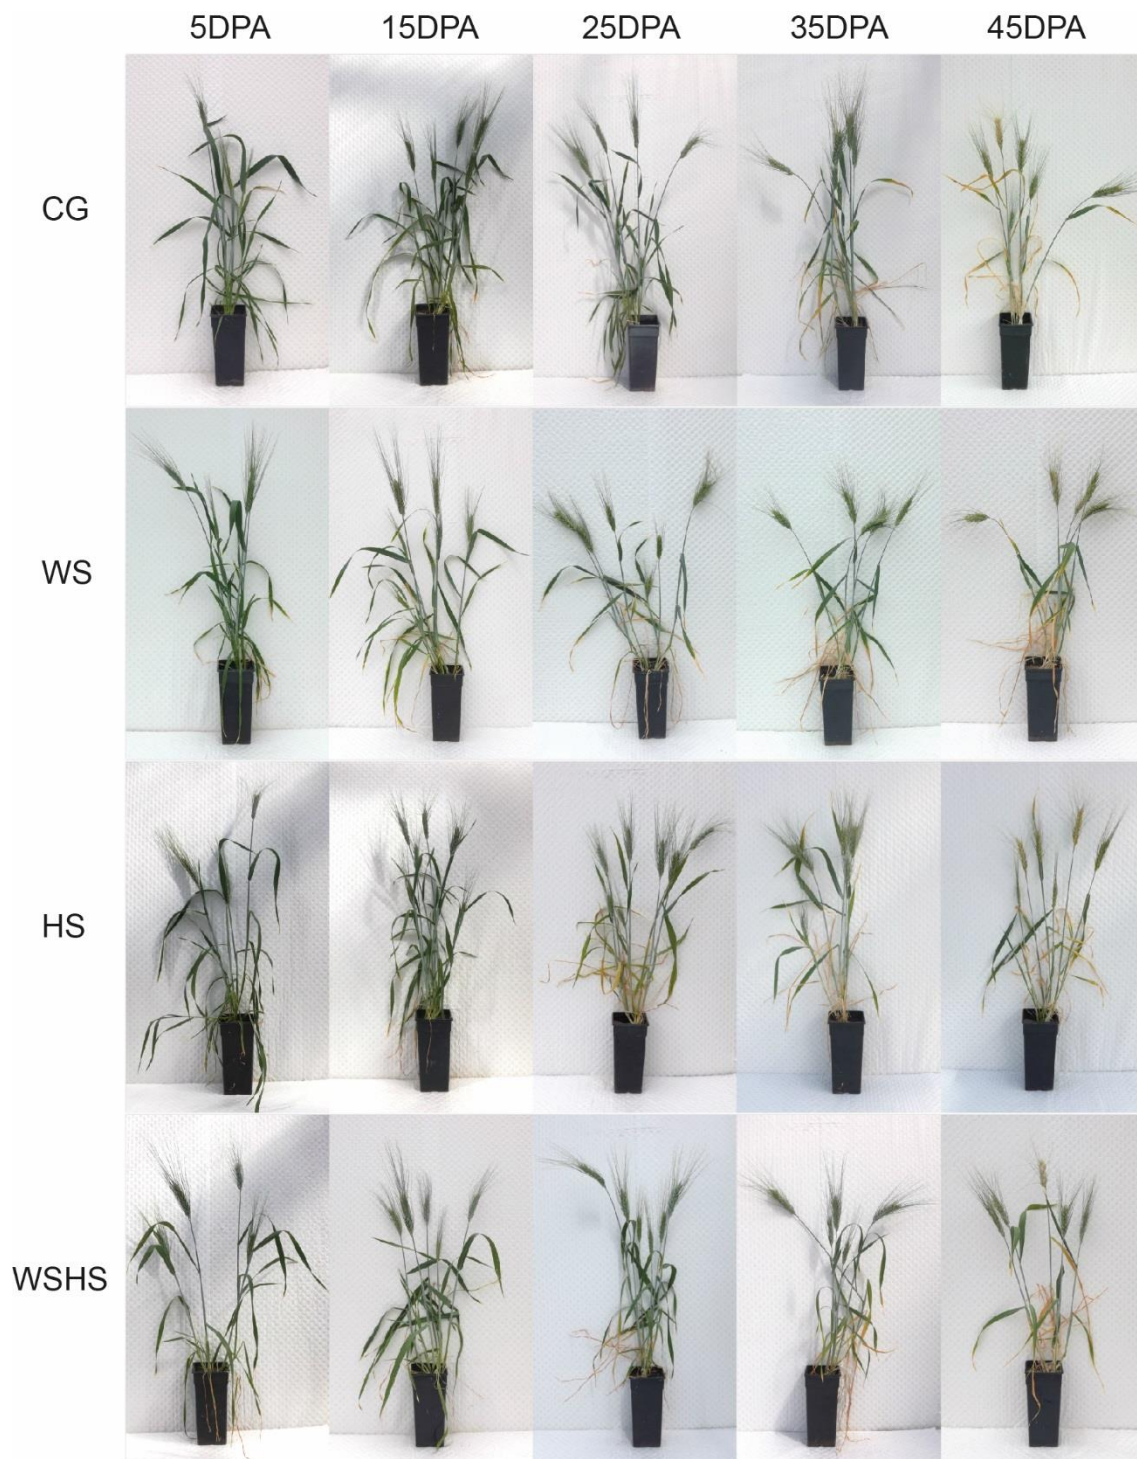



**Supplementary Figure S4.** Weight of all spikes per plant (a), spike harvest index (b), spikelet number per plant (c), grain number per spike (d), and spikelet number per spike (e) of ten durum wheat genotypes in four treatment groups. Means  $\pm$  SE for  $n = 6$  are shown. Different letters (a, b, c) denote statistically significant differences at the  $P < 0.05$  level among treatment groups. When no letters were shown there was no statistical difference ( $P > 0.05$ ) detected among the treatment groups. CG, control group; WS, water stress group; HS, heat stress group; WSHS, combined water stress and heat stress group.

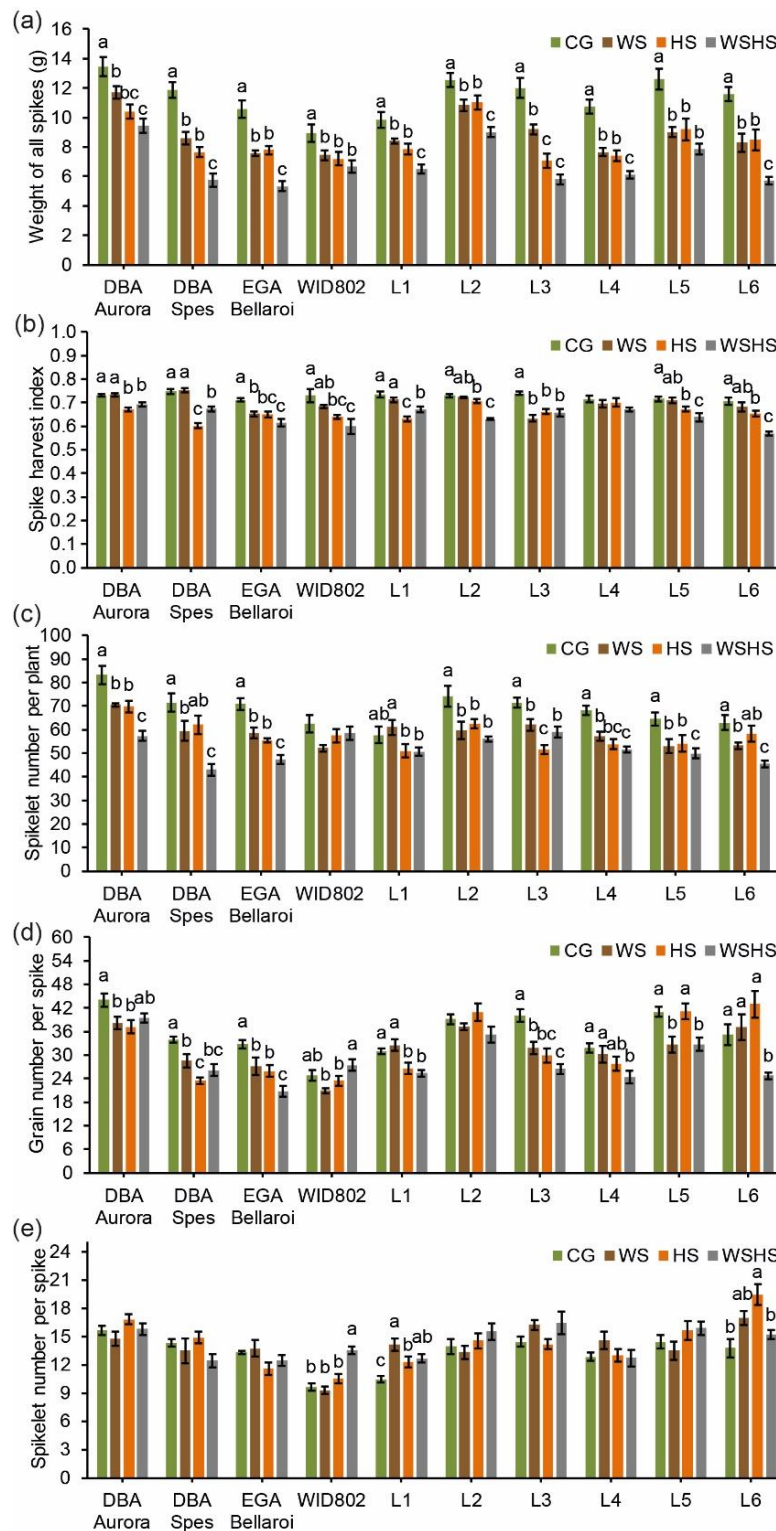

Supplement: 41598_2019_49871_MOESM1_ESM.pdf [file 41598_2019_49871_MOESM1_ESM.pdf]
